# Supplementary material for: Mediterranean Diet Adherence and Health-Related Quality of Life during Pregnancy: Is the Mediterranean Diet Beneficial in Non-Mediterranean Countries?
Source: MDPI journal article supplement (doi:10.3390/nu16050718), 2024-03-01
Supplement: s1 [file s1]

## **Supplementary Material**

Supplement to: **“Mediterranean diet adherence and health-related quality of life during pregnancy: is the Mediterranean diet beneficial in non-Mediterranean countries?”**.

### **Table of contents**

**Supplementary Table S1.** Inclusion and exclusion criteria in the GESTAFIT and Healthymoms project.

**Supplementary Table S1.** Inclusion and exclusion criteria in the GESTAFIT and Healthymoms project.

| <b>GESTAFIT Project</b>                                                                                                                                                                                                                                                                                                                                                                                                                                                                                                                                                                                                                                                                                                                                                                                                                                                                                                                                                                                                             |
|-------------------------------------------------------------------------------------------------------------------------------------------------------------------------------------------------------------------------------------------------------------------------------------------------------------------------------------------------------------------------------------------------------------------------------------------------------------------------------------------------------------------------------------------------------------------------------------------------------------------------------------------------------------------------------------------------------------------------------------------------------------------------------------------------------------------------------------------------------------------------------------------------------------------------------------------------------------------------------------------------------------------------------------|
| <b>Inclusion criteria</b>                                                                                                                                                                                                                                                                                                                                                                                                                                                                                                                                                                                                                                                                                                                                                                                                                                                                                                                                                                                                           |
| <ul style="list-style-type: none"> <li>- Pregnant women aged 25-40 years old with a normal pregnancy course.</li> <li>- Answering “no” to all questions on the PARmed-X for pregnancy.</li> <li>- Being able to walk without assistance.</li> <li>- Being able to read and write properly.</li> <li>- Informed consent: Being capable and willing to provide written consent.</li> </ul>                                                                                                                                                                                                                                                                                                                                                                                                                                                                                                                                                                                                                                            |
| <b>Exclusion criteria</b>                                                                                                                                                                                                                                                                                                                                                                                                                                                                                                                                                                                                                                                                                                                                                                                                                                                                                                                                                                                                           |
| <ul style="list-style-type: none"> <li>- Having acute or terminal illness.</li> <li>- Having malnutrition.</li> <li>- Being unable to conduct tests for assessing physical fitness or exercise during pregnancy.</li> <li>- Having pregnancy risk factors (such as hypertension, type 2 diabetes, etc.).</li> <li>- Having a multiple pregnancy.</li> <li>- Having chromosopathy or foetal malformations.</li> <li>- Having uterine growth restriction.</li> <li>- Having foetal death.</li> <li>- Having upper or lower extremity fracture in the past 3 months.</li> <li>- Suffering neuromuscular disease or presence of drugs affecting neuromuscular function.</li> <li>- Being registered in another exercise program.</li> <li>- Performing more than 300 minutes of at least moderate physical activity per week.</li> <li>- Being engaged in another physical exercise program</li> <li>- Being unwilling either to complete the study requirements or to be randomized into the control or intervention group.</li> </ul> |
| <b>Healthymoms Project</b>                                                                                                                                                                                                                                                                                                                                                                                                                                                                                                                                                                                                                                                                                                                                                                                                                                                                                                                                                                                                          |
| <b>Inclusion criteria</b>                                                                                                                                                                                                                                                                                                                                                                                                                                                                                                                                                                                                                                                                                                                                                                                                                                                                                                                                                                                                           |
| <ul style="list-style-type: none"> <li>-Pregnant women aged 18 years or older</li> <li>-Singleton pregnancy</li> <li>-Ability to read and speak the Swedish language good enough to understand the HealthyMoms app and to provide informed consent</li> </ul>                                                                                                                                                                                                                                                                                                                                                                                                                                                                                                                                                                                                                                                                                                                                                                       |
| <b>Exclusion criteria</b>                                                                                                                                                                                                                                                                                                                                                                                                                                                                                                                                                                                                                                                                                                                                                                                                                                                                                                                                                                                                           |
| <ul style="list-style-type: none"> <li>-History of an eating disorder</li> <li>-Pre-pregnancy diabetes, and other medical conditions or pharmacological treatment that could alter body weight prior to gestation</li> </ul>                                                                                                                                                                                                                                                                                                                                                                                                                                                                                                                                                                                                                                                                                                                                                                                                        |
